# Supplementary material for: A low toxic synthetic dendrimer conjugated podophyllotoxin nanodevice with potent antitumor activity against the DMBA/TPA induced mouse skin carcinogenesis model
Source: Royal Society of Chemistry journal article supplement (doi:10.1039/c5tx00112a), 2015-01-01
Supplement: c5tx00112a1.pdf [file c5tx00112a1.pdf]

**Supporting documents**

**Low toxic synthetic dendrimer conjugated podophyllotoxin nanodevice with potent antitumor activity against DMBA/TPA induced mouse skin carcinogenesis model**

Ugir Hossain Sk<sup>1\*</sup>, Vikram Patial<sup>2</sup>, Supriya Sharma<sup>2</sup>

<sup>1</sup>Natural Products Chemistry and Process Development Division, <sup>2</sup>Regulatory Research Centre, Institute of Himalayan Bioresource Technology, Palampur, H.P. 176 061, India.

\*To whom correspondence should be addressed:

<sup>1</sup>Natural Products Chemistry and Process Development Division, Institute of Himalayan Bioresource Technology, Palampur, H.P. 176 061, India

Tel.:

Fax:

E-mail: [uhocju@gmail.com](mailto:uhocju@gmail.com) and [ugir@ihbt.res.in](mailto:ugir@ihbt.res.in)

# 1H Experiment

Current Data Parameters  
 NAME un-podo  
 EXPNO 1  
 PROCNO 1

F2 - Acquisition Parameters  
 Date\_ 20150220  
 Time 15.44  
 INSTRUM spect  
 PROBD 5 mm FAPBO BB/  
 PULPROG zg30  
 TD 65536  
 SOLVENT CDCl3  
 NS 32  
 DS 2  
 SWH 12019.230 Hz  
 FIDRES 0.183399 Hz  
 AQ 2.7263477 sec  
 RG 50.21  
 DW 41.600 usec  
 DE 6.50 usec  
 TE 293.9 K  
 D1 1.00000000 sec  
 TD0 1

===== CHANNEL f1 =====  
 SFO1 600.3029254 MHz  
 NUC1 1H  
 P1 11.47 usec  
 PLW1 25.0000000 W

F2 - Processing parameters  
 SI 65536  
 SF 600.3000140 MHz  
 EM  
 WDW 0  
 SSB 0  
 LB 0.30 Hz  
 GB 0  
 PC 1.40

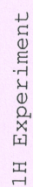

Figure S2:  $^{13}\text{C}$ -NMR of the compound PODO-linker in  $\text{CDCl}_3$

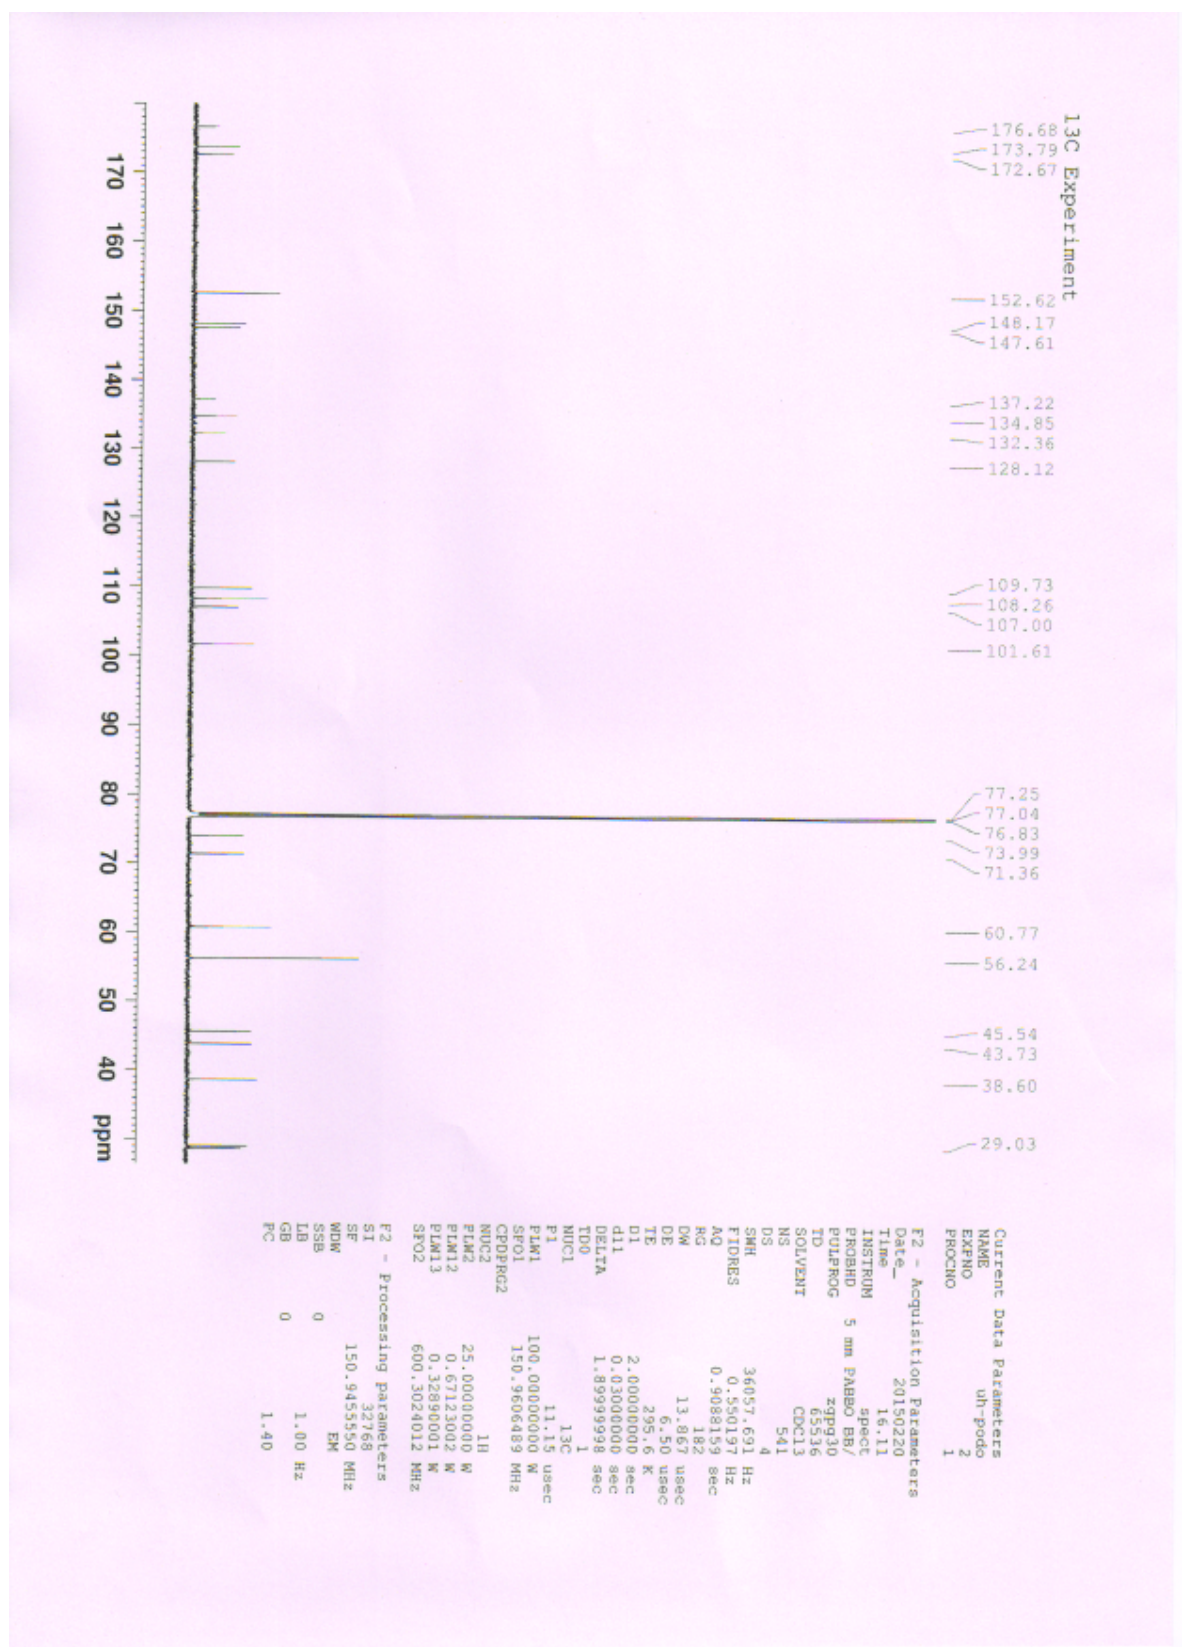



**Figure S3:**  $^1\text{H}$ -NMR of the compound D-PODO-linker in DMSO

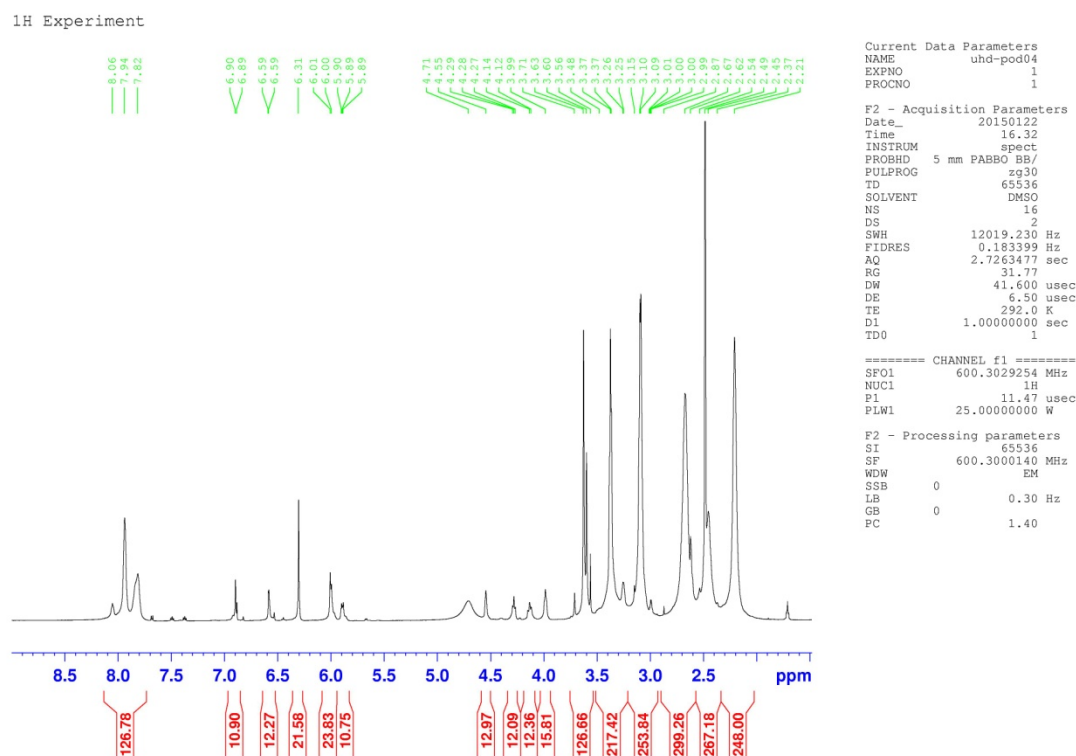

$^1\text{H}$ -NMR (600 MHz,  $\text{DMSO-d}_6$ ): 7.81-8.05(m, amide  $-\text{NH}$  from D), 6.89 (s, 1H, Ar-H8 ), 6.59 (s, 1H, Ar-H5), 6.30(s, 2H, Ar-H-2' & 6'), 6.00(m, 2H, H-13), 5.89 (m, 1H, H-4), 4.54 ( $\text{CH}_2\text{-O}$  from D), 4.27 (m, 1H, H-1), 4.12(m, 1H, H-11), 3.98 (m, 1H, H-11), 3.61 (s, 3H,  $-\text{OCH}_3$  –H), 3.63 (s, 6H,  $-\text{OCH}_3$  –H), 3.25-2.20 (m, H-2, H-3, and proton from PODO-linker (a & b), and internal D-proton).

**Figure S4.** MALDI-TOF-MS showing increase in the molecular weight of the dendrimer conjugates. The relative change in molecular weight upon conjugation of linker attached PODO to the dendrimer (D). D (13573) and D-PODO (17464) conjugate; also previous generation D (6853) and conjugate D-PODO (8950)

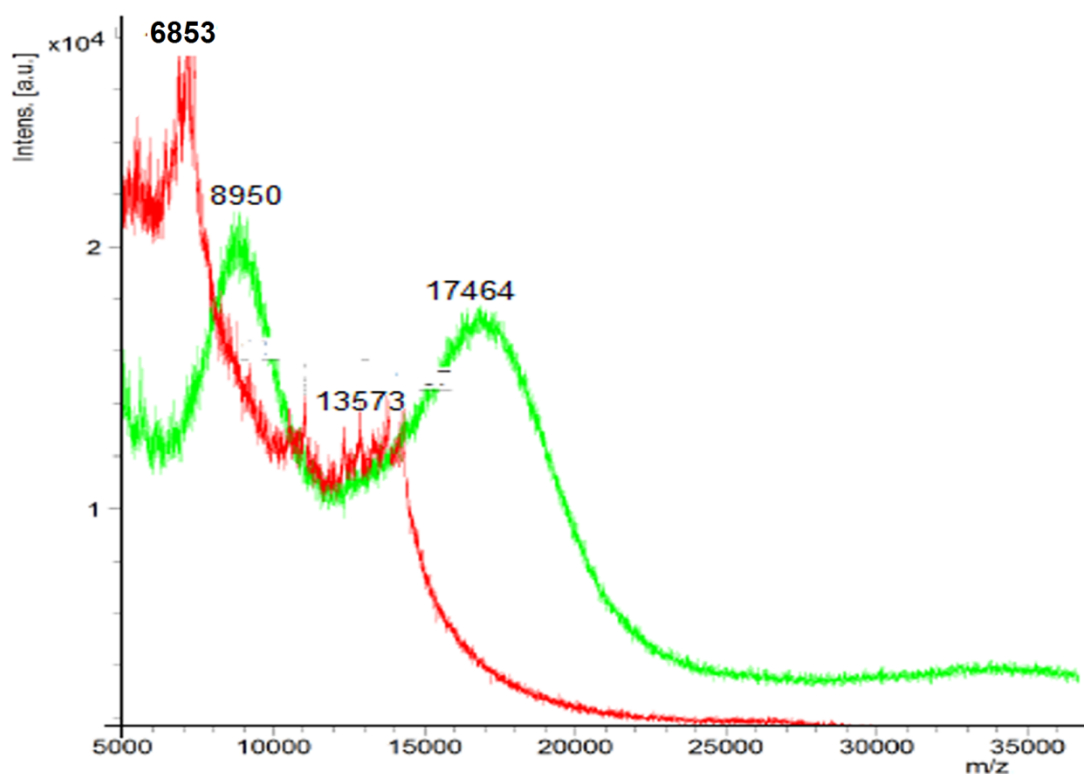

Figure S5: Histopathological data for toxicity evaluation

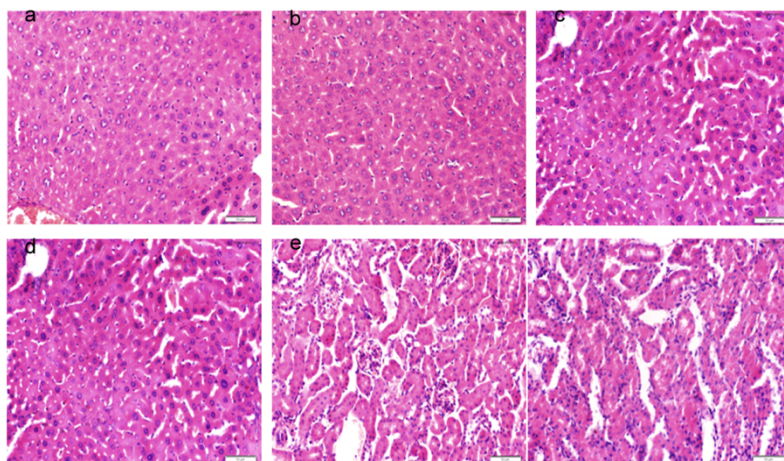

Histopathological analysis (20x) of liver (up) and kidney (down) after 14 week of treatment schedule alone with concomitant topical application of carcinogen. (a and d: carcinogen control; b and e: 4 mg/kg D-PODO treatment group; c and f: 8 mg/kg treatment of D-PODO. Observation indicates there were not much change of hepatocytes and kidney cell after long term treatment with D-PODO.

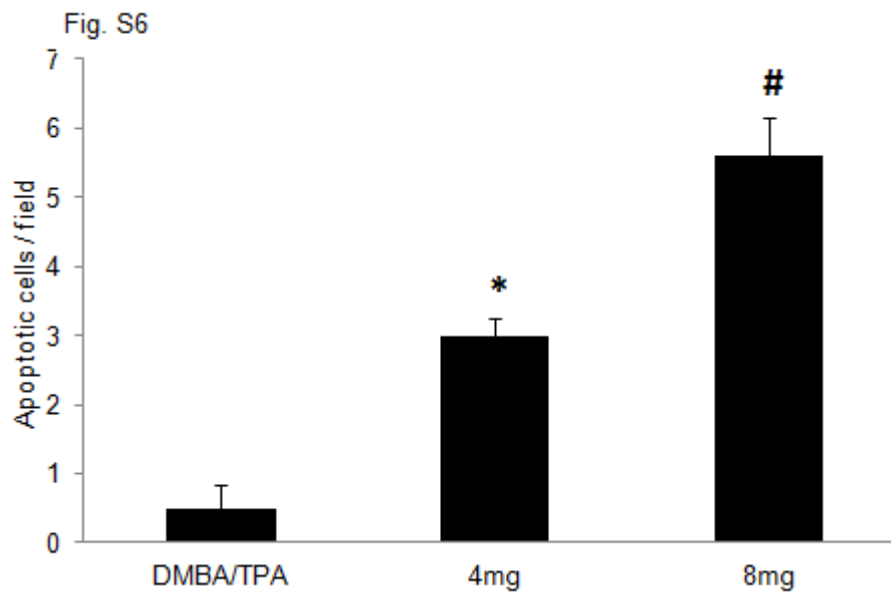

Figure 6: Graphical representation of apoptotic cells of DMBA-TPA (carcinogen control), 4 mg/ kg and 8 mg/kg treatment groups. (\*): The compares made between the control and 4 mg group and the significance level is  $p < 0.05$  and (#): 8 mg group compared in between 4 mg as well as with control group, level of significance is  $p < 0.05$ .

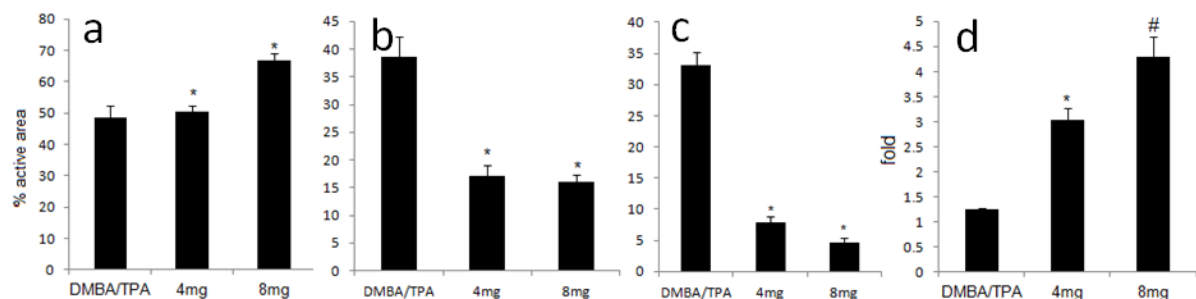

Figure S7. D-PODO induced expression of Bax (a); Bcl2(b), NFκB(c) and Bax/Bcl2 (d) ratio: graphical representation of the active area and their statistical significance; mean  $\pm$  SEM compares made between DMBA/TPA and the treatment group, data were significance upto  $p > 0.05$ , whereas # indicated data were significance in compares to DMBA/TPA and 4 mg treatment group.
